# Supplementary material
Source: PubMed Central journal article supplement (PMC4174931)
Supplement: 5c611a00d992befd94a7ed16c887f1ad_genetics.114.167395-2.pdf [file 5c611a00d992befd94a7ed16c887f1ad_genetics.114.167395-2.pdf]

**Table S2 Primers used in strain construction and DNA sequence analysis**

| <b>Primer name</b>   | <b>SGD coordinates<br/>for primer<br/>sequence</b> | <b>Primer sequence (5' to 3')</b>                                           | <b>Purpose</b>      |
|----------------------|----------------------------------------------------|-----------------------------------------------------------------------------|---------------------|
| RE HS2 HYG F         | IV957528-957578                                    | CTTCCGTTATGACCCCTCATCCGTTTAAATGTTATTTGTT<br>TTTATGGTATTCGTACGCTGCAGGTCGAC   | Strain construction |
| RE HS2 HYG R         | IV957629-957579                                    | AGGGGTTACAGGGATCAACAAAAAAGCAAGAAAA<br>AAAATGAATAAAGGGATCGATGAATTCGAGCTCG    | Strain construction |
| IV 1510386::SUP4-o F | IV1510336                                          | CATACGTTATGCACTTCATTCTTCTTGTCGGTTTGATAA<br>CAGCAGAATCTAGGATCCGGGACCGGATAAT  | Strain construction |
| IV 1510386::SUP4-o R | IV1510436                                          | GCGTTTTCGAGGTATGGCTTCTGCCGGGCTAACGTTC<br>AATTAAAGGAAGTGGATCCGGAATTCCTGAAAG  | Strain construction |
| RE HS2 URA3 F        | IV1013167-<br>1013217                              | TTTATATAGATAAACAACTTGCAGGACAGATAGTTAA<br>GCGTCTATATCATAATGTGGCTGTGGTTTCAGG  | Strain construction |
| RE HS2 URA3 R        | IV1013268-<br>1013218                              | TCTTTTTGCCTTTTATCATTTTTGTACTTTTTCTTCGCT<br>TAAAATACACAGATTCGCGGTAATAACTG    | Strain construction |
| MAT ALPHA NAT F      | III293135-293178                                   | ATATATATATATATATTCTACACAGATATATACATATTT<br>GTTTTTCGGGCCGTACGCTGAAGGTCGAC    | Strain construction |
| MAT ALPHA NAT R      | III294497-294545                                   | TGAACAACATTCAGTACTCGAAAGATAAACAACCTCCG<br>CCACGACCACACTCATCGATGAATTCGAGCTCG | Strain construction |
| URA3-ey F            | IV 1013093-<br>1013112                             | GCCACCCATCTGATAAAAAGG                                                       | DNA sequencing      |
| URA3-ey R            | IV 1013321-<br>1013339                             | CTCCCCGCTGTTAATTTT                                                          | DNA sequencing      |
| URA3-1 F             | V116039-116058                                     | AACGAAGGAAGGAGCACAGA                                                        | DNA sequencing      |
| URA3-1 R             | V117042-117061                                     | GACCGAGATTCGCGGTAAT                                                         | DNA sequencing      |

The SGD coordinates are for the 2014 version of the sequence.
