# Supplementary material
Source: PubMed Central journal article supplement (PMC4174931)
Supplement: c31b0c9b48e3c67f5d477263d47b4b43_genetics.114.167395-7.pdf [file c31b0c9b48e3c67f5d477263d47b4b43_genetics.114.167395-7.pdf]

**Table S3 Primers used in analysis of polymorphic markers**

| SGD coordinates for polymorphic site <sup>1</sup> | Primer name   | Primer sequence (5' to 3') | Diagnostic restriction enzyme <sup>2</sup> |
|---------------------------------------------------|---------------|----------------------------|--------------------------------------------|
| IV 1002467                                        | IV 1002467 F1 | TGCAGGGATATGTATAACGAGGT    | <b>HpyCH4III</b>                           |
|                                                   | IV 1002467 R2 | CAACGTTGTGAAGTGGTTGG       |                                            |
| IV 1011936                                        | IV 1011936 F4 | TCCTACGATCGTACAATCCCG      | <b>MnlI</b>                                |
|                                                   | IV 1011936 R1 | CCTCGTACATGTTTTCTTGCC      |                                            |
| IV 1013924                                        | IV 1013924 F3 | GCGACTGGTGGTAAGAAAAGG      | <b>MluCI</b>                               |
|                                                   | IV 1013924 R1 | AAACCCGAGACAGCGAGAGG       |                                            |
| IV 1022417                                        | IV1022417 F2  | CAAGTTTGGTATGGCAGTTGAC     | <i>MlyI</i>                                |
|                                                   | IV 1022417 R1 | GACTCGTCTTGTATGGCG         |                                            |
| IV 1028509                                        | IV 1028509 F2 | CCGAACGGTTATGGTATCTCC      | <i>EarI</i>                                |
|                                                   | IV 1028509 R3 | GCAACAGCGCGTATTTGG         |                                            |
| IV 1037347                                        | IV 1037347 F1 | GCCAAGATCGTTAAAGAGAATCC    | <i>HpyCH4V</i>                             |
|                                                   | IV 1037347 R1 | AGCAATCTTTGAACCATCGC       |                                            |
| IV 1044571                                        | IV 1044571 F3 | GGCTACTATTGTGGCTGTTGG      | <i>Sau3AI</i>                              |
|                                                   | IV 1044571 R1 | ACTACGTCGATATTCTTCAGGG     |                                            |
| IV 1051452                                        | IV 1051452 F1 | TCATGCCAAAGTAATAAGCAGC     | <i>MspI</i>                                |
|                                                   | IV 1051452 R1 | TGAGCGCTAAAATGTATGCC       |                                            |
| IV 1058335                                        | IV 1058335 F1 | TGCCTGGATACACGAACATATATATG | <i>AfeI</i>                                |
|                                                   | IV 1058335 R1 | CGGTGAGATTGTTGCGGTGTT      |                                            |

<sup>1</sup>Current (2014) SGD coordinates.

<sup>2</sup>Bold-faced type indicates that the SNP in the W303-1A genetic background had the indicated restriction site. Plain-faced type indicates that the SNP in the YJM789 background had the site.
